# Supplementary material for: Ferroptosis response segregates small cell lung cancer (SCLC) neuroendocrine subtypes
Source: PubMed Central journal article supplement (PMC8024350; doi:10.1038/s41467-021-22336-4), 2021-04-06
Supplement: 41467_2021_22336_MOESM3_ESM.pdf [file 41467_2021_22336_MOESM3_ESM.pdf]

## **Description of Additional Supplementary Files**

File Name: Supplementary Data 1

Description: 181.5 stickers as compared to 181.5 floaters treated with either DMSO or RSL3 [1  $\mu$ M] for 5 h and then subjected to lipidomics. Samples for each condition (n=5) were averaged and normalized to the cell number ( $2.5 \times 10^6$ ). Data correspond to one representative out of two independent experiments.
